# Supplementary material for: Evaluation of Genetic Testing in a Cohort of Diverse Pediatric Patients in the United States with Congenital Cataracts
Source: MDPI journal article supplement (doi:10.3390/genes14030608), 2023-02-28
Supplement: s1 [file s1]

Supplementary Table S1 (A-F) Genes tested for in 7 different commercially available targeted panels.

| Table S1A. Prevention Genetics                                                                                                                                                                                                                                                                                                                                                                                                                                                 |                                                                                                                                                                                                                                                                                                                                                                                                                                                                                                                                                                                                                                                                                                                                                                                                                                                                                                                                                                                                                                                                                                                                                                                                                                                              |
|--------------------------------------------------------------------------------------------------------------------------------------------------------------------------------------------------------------------------------------------------------------------------------------------------------------------------------------------------------------------------------------------------------------------------------------------------------------------------------|--------------------------------------------------------------------------------------------------------------------------------------------------------------------------------------------------------------------------------------------------------------------------------------------------------------------------------------------------------------------------------------------------------------------------------------------------------------------------------------------------------------------------------------------------------------------------------------------------------------------------------------------------------------------------------------------------------------------------------------------------------------------------------------------------------------------------------------------------------------------------------------------------------------------------------------------------------------------------------------------------------------------------------------------------------------------------------------------------------------------------------------------------------------------------------------------------------------------------------------------------------------|
| FREE CATARACT PANEL                                                                                                                                                                                                                                                                                                                                                                                                                                                            | COMPREHENSIVE CATARACT PANEL                                                                                                                                                                                                                                                                                                                                                                                                                                                                                                                                                                                                                                                                                                                                                                                                                                                                                                                                                                                                                                                                                                                                                                                                                                 |
| ABHD12, ADAMTSL4, ALDH18A1, BCOR, BEST1, BFSP1, BFSP2, CHMP4B, COL11A1, COL18A1, COL2A1, COL4A1, CRYAA, CRYAB, CRYBA1, CRYBA2, CRYBA4, CRYBB1, CRYBB2, CRYGC, CRYGD, CRYGS, CYP27A1, DYNC1H1, EPHA2, ERCC2, FAM126A, FOXE3, FTL, FYCO1, FZD4, GALE, GALK1, GALT, GCNT2, GJA3, GJA8, GLA, HSF4, LEMD2, LIM2, LONP1, MAF, MIP, MIR184, MYH9, NACC1, NDP, NF2, NHS, OPA3, P3H2, PAX6, PITX3, RAB3GAP1, RDH11, RECQL4, SC5D, SIL1, SLC16A12, TFAP2A, TGM3, UNC45B, VIM, WRN, XYLT2 | ABCB6, ADAMTS10, AGK, AGPS, AKAP14, ALDH18A1, ALPL, B3GLCT, BCOR, BEST1, BFSP1, BFSP2, BMP4, BMP7, CAPN15, CCNP, CHMP4B, COL11A1, COL18A1, COL2A1, COL4A1, COL4A2, CRYAA, CRYAB, CRYBA1, CRYBA4, CRYBB1, CRYBB2, CRYBB3, CRYGB, CRYGC, CRYGD, CRYGS, CTDP1, CYP27A1, DHCR7, ELP4, EPG5, EPHA2, ERCC1, ERCC2, ERCC5, ERCC6, ERCC8, ESCO2, EVA1A, EYA1, FAM126A, FAM131A, FBN1, FOXC1, FOXE3, FTL, FYCO1, FZD4, GALK1, GCNT2, GJA1, GJA3, GJA8, GJC3, GLA, GNPAT, GPR160, GRWD1, HCCS, HMX1, HSF4, INPP5B, JAM3, KLHL21, LAMB1, LARGE1, LCT, LENG8, LIM2, LMX1B, LRP5, LTBP2, LTBP3, MAB21L1, MAF, MAN1C1, MAN2B1, MAP6D1, MECR, MEIS1, MIP, MIR184, MMP1, MSRA, MTMR7, MXRA8, MYH9, NDUFA1, NECTIN2, NECTIN3, NF2, NHS, NIPAL3, NRCAM, OCRL, OPA3, OTX2, P3H2, PAX6, PEAK1, PEX1, PEX10, PEX11B, PEX12, PEX13, PEX16, PEX2, PEX26, PEX3, PEX6, PEX7, PITX2, PITX3, PLD1, PLD3, POMT1, POMT2, PON2, PRKCI, PROX1, PRX, PTCH1, PTPRU, PXDN, RAB18, RAB3GAP1, RAB3GAP2, RECQL4, RHOBTB2, SC5D, SEC23A, SEMA3A, SIL1, SIPA1L3, SIX3, SIX5, SIX6, SLC16A12, SLC1A5, SLC25A13, SLC25A33, SLC25A40, SLC2A1, SLC33A1, SOX1, SOX2, SPINT2, SRD5A3, SREBF2, STEAP1, STEAP2, TACR1, TBC1D20, TDRD7, TMED3, TMEM114, TNPO1, TRAPPC6A, TTC14, UPF3B, VIM, VSX2, WFS1, YBX1 |

| Table S1B. Invitae Panel                                                                                                                                                                                                                                                                                                                                                                                                                                                                                                                                                                                                                                                                                                                         |                          |
|--------------------------------------------------------------------------------------------------------------------------------------------------------------------------------------------------------------------------------------------------------------------------------------------------------------------------------------------------------------------------------------------------------------------------------------------------------------------------------------------------------------------------------------------------------------------------------------------------------------------------------------------------------------------------------------------------------------------------------------------------|--------------------------|
| Initial Genes                                                                                                                                                                                                                                                                                                                                                                                                                                                                                                                                                                                                                                                                                                                                    | Optional Genes           |
| ABCA3, ABCB6, ABHD12, ADAMTS18, ADAMTSL4, AGK, ALDH18A1, BCOR, BEST1, BFSP1, BFSP2, CHMP4B, CLN3, COL11A1, COL18A1, COL2A1, COL4A1, COL4A2, CRYAA, CRYAB, CRYBA1, CRYBA4, CRYBB1, CRYBB2, CRYBB3, CRYGB, CRYGC, CRYGD, CRYGS, CTDP1, CYP27A1, CYP51A1, EPG5, EPHA2, ERCC2, ERCC5, ERCC6, ERCC8, EYA1, FAM126A, FOXC1, FOXE3, FTL, FYCO1, FZD4, GALK1, GALT, GCNT2, GFER, GJA1, GJA3, GJA8, HMX1, HSF4, JAM3, LEMD2, LIM2, LONP1, LSS, MAF, MIP, MIR184, MYH9, NDP, NF2, NHS, OCRL, OPA3, P3H2, PAX6, PEX10, PEX11B, PEX16, PEX2, PEX7, PITX2, PITX3, PXDN, RAB18, RAB3GAP1, RAB3GAP2, RDH11, RECQL4, RGS6, RNLS, RRAGA, SC5D, SIL1, SIPA1L3, SIX6, SLC16A12, SLC33A1, TBC1D20, TDRD7, TFAP2A, TMEM70, UNC45B, VIM, VSX2, WDR87, WFS1, WRN, XYLT2 | CHMP4B, CRYGB, LIM2, VIM |

**Table S1C. GeneDx Cataract Panel**

CRYBB3, ABCA3, ABHD5, ADAMTSL4, AGK, AKR1E2, ALDH18A1, BCOR, BEST1, BFSP1, BFSP2, CHMP4B, COL11A1, COL2A1, COL4A1, COL4A2, CRYAA, CRYAB, CRYBA1, CRYBA2, CRYBA4, CRYBB1, CRYBB2, CRYGB, CRYGC, CRYGD, CRYGS, CTDP1, CYP27A1, CYP51A1, EBP, EPG5, EPHA2, ERCC2, ERCC5, ERCC6, ERCC8, EYA1, FAM126A, FOXC1, FOXE3, FTL, FYCO1, FZD4, GALK1, GALT, GCNT2, GFER, GJA1, GJA3, GJA8, HMX1, HSF4, JAM3, LIM2, LONP1, LSS, MAF, MAN2B1, MIP, MIR184, MYH9, NDP, NF2, NHS, OCRL, OPA3, PAX6, PEX11B, PEX7, PITX2, PITX3, PXDN, RAB18, RAB3GAP1, RAB3GAP2, RECQL4, RGS6, RNLS, RRAGA, SC5D, SIL1, SIPA1L3, SIX6, SLC16A12, SLC33A1, TBC1D20, TDRD7, TFAP2A, TMEM70, UNC45B, VIM, VSX2, WDR87, WFS1, WRN

**Table S1D. Fulgent Cataract panel**

ABHD12, AGK, BEST1, BFSP1, BFSP2, CAV1, CHMP4B, CLPB, COL18A1, CRYAA, CRYAB, CRYBA1, CRYBA2, CRYBA4, CRYBB1, CRYBB2, CRYBB3, CRYGB, CRYGC, CRYGD, CRYGS, CTDP1, EPHA2, EYA1, FAM126A, FOXE3, FTL, FYCO1, GALK1, GCNT2, GFER, GJA3, GJA8, HSF4, JAM3, LEMD2, LIM2, LSS, MIP, MIR184, MSMO1, NHS, P3H2, PAX6, PITX3, PXDN, RDH11, SIL1, SIPA1L3, SIX6, SLC16A12, SLC33A1, TDRD7, UNC45B, VIM, WFS1

**Table S1E. CD Genomics Gene Panel (can choose which genes you want)**

ABCA3, ADAMTSL4, AGK, AKR1E2, ALDH18A1, BCOR, BEST1, BFSP1, BFSP2, CHMP4B, COL11A1, COL2A1, COL4A1, COL4A2, CRYAA, CRYAB, CRYBA1, CRYBA2, CRYBA4, CRYBB1, CRYBB2, CRYGB, CRYGC, CRYGD, CRYGS, CTDP1, CYP27A1, CYP51A1, EOGT, EPHA2, FAM126A, FOXC1, FOXE3, FTL, FYCO1, FZD4, GALK1, GCNT2, GFER, GJA1, GJA3, GJA8, HMX1, HSF4, JAM3, LIM2, LONP1, LSS, MAF, MIP, MIR184, MYH9, NDP, NF2, NHS, OCRL, OPA3, P3H2, PAX6, PITX2, PITX3, PXDN, RAB18, RAB3GAP1, RAB3GAP2, RECQL4, RGS6, RNLS, RRAGA, SC5D, SIL1, SIPA1L3, SIX6, SLC16A12, SLC33A1, TBC1D20, TDRD7, TFAP2A, TMEM70, UNC45B, VIM, VSX2, WDR87, WFS1, WRN

**Table S1F. Blueprint genetics cataract panel**

ABCB6, ADAMTS18, ADAMTSL4, AGK, ALDH18A1, BCOR, BFSP1, BFSP2, CHMP4B, COL11A1, COL18A1, COL2A1, COL4A1, CRYAA, CRYAB, CRYBA1, CRYBA4, CRYBB1, CRYBB2, CRYBB3, CRYGC, CRYGD, CRYGS, CTDP1, CYP27A1, DNMBP, EPHA2, ERCC2, ERCC5, ERCC6, ERCC8, EYA1, FAM126A, FOXE3, FTL, FYCO1, FZD4, GALE, GALK1, GALT, GCNT2, GJA1, GJA3, GJA8, HSF4, LEMD2, LIM2, MAF, MIP, MT-ATP6, MT-ATP8, MT-CO1, MT-CO2, MT-CO3, MT-CYB, MT-ND1, MT-ND2, MT-ND3, MT-ND4, MT-ND4L, MT-ND5, MT-ND6, MT-RNR1, MT-RNR2, MT-TA, MT-TC, MT-TD, MT-TE, MT-TF, MT-TG, MT-TH, MT-TI, MT-TK, MT-TL1, MT-TL2, MT-TM, MT-TN, MT-TP, MT-TQ, MT-TR, MT-TS1, MT-TS2, MT-TT, MT-TV, MT-TW, MT-TY, MYH9, NDP, NF2, NHS, OCRL, OPA3, P3H2, PAX6, PITX3, PXDN, RAB18#, RAB3GAP1, RAB3GAP2#, RECQL4, SIL1, SIPA1L3, SLC16A12, SLC33A1, TBC1D20, TDRD7, TFAP2A, TMEM70, VIM, VSX2, WFS1, WRN, XYLT2

Supplementary Table S2. Individual Patient Demographics

| Patient # | Race / Ethnicity | Systemic Illness/Syndrome                                                                                                                                                                                                        | Ocular Findings                                                                                                                | Type of Cataract                                                                          | Family History | Age at Surgery |
|-----------|------------------|----------------------------------------------------------------------------------------------------------------------------------------------------------------------------------------------------------------------------------|--------------------------------------------------------------------------------------------------------------------------------|-------------------------------------------------------------------------------------------|----------------|----------------|
| 1         | White/NH         | WAGR syndrome, pineal gland hypoplasia, tachycardia with prolonged QTc, persistent left superior vena cava, Wilms tumor in one kidney                                                                                            | Congenital ptosis OD, aniridia, glaucoma, intermittent exotropia, nystagmus, amblyopia OD, absent cranial nerve VI bilaterally | OU: Anterior polar cataracts                                                              | No             | Unknown        |
| 2         | Other/Hispanic   | Developmental delay                                                                                                                                                                                                              | Optic nerve temporal pallor with sloping OU, mild attenuation of vessels OU, mild intermittent exotropia                       | OU: Scattered flecks with 1+ posterior subcapsular cataract and trace cortical changes OU | No             | >10 years      |
| 3         | White/NH         | 2 vessel cord, hypotonia at birth, small for gestational age, small kidneys, left mild pelviectasis, sacral dimple, ventral hypospadias, left pulmonary artery hypoplasia, epilepsy, hypospadias, micrognathia, globally delayed | No                                                                                                                             | OU: Large nuclear cataracts                                                               | No             | <1 year        |
| 4         | White/NH         | Micrognathia, dysmorphic appearance due to in-utero constriction                                                                                                                                                                 | Physiologic anisocoria                                                                                                         | OU: Posterior lenticular opacity <1 mm                                                    | No             | Unknown        |
| 5         | Other/Hispanic   | Cleft lip/palate, poor feeding, small VSD and PFO, prolonged QTc interval, hearing loss                                                                                                                                          | Left congenital ptosis                                                                                                         | OU: Cortical cataracts                                                                    | No             | Unknown        |
| 6         | White/NH         | Microcephaly, bilateral sensorineural hearing loss, reflux, developmental delay, poor growth                                                                                                                                     | OD microphthalmia, OU chorioretinal colobomas, OD optic nerve coloboma, OU iris colobomas                                      | OD: Small nuclear cataract, OS: Clear                                                     | No             | Unknown        |
| 7         | Other/Hispanic   | Thyroglossal cyst, learning disorder, ADHD, expressive language disorder                                                                                                                                                         | Intermittent esotropia                                                                                                         | OD: Nasal posterior polar cataract, not in visual axis, OS: Posterior polar,              | No             | 1-10 years     |

|    |                |                                                                                                                                                                                                                                                                                         |                                                                  |                                                                                                   |    |            |
|----|----------------|-----------------------------------------------------------------------------------------------------------------------------------------------------------------------------------------------------------------------------------------------------------------------------------------|------------------------------------------------------------------|---------------------------------------------------------------------------------------------------|----|------------|
|    |                |                                                                                                                                                                                                                                                                                         |                                                                  | nuclear and cortical cataract                                                                     |    |            |
| 8  | White/NH       | Developmental delays/ASD                                                                                                                                                                                                                                                                | Aphakic glaucoma OU, esotropia                                   | OU: cataracts of unknown description                                                              | No | <1 year    |
| 9  | White/NH       | Microcephaly, developmental delay, CNS calcifications                                                                                                                                                                                                                                   | OU mild microphthalmia, persistent pupillary membrane, esotropia | OU: Dense posterior subcapsular polar cataracts in center of visual axis, OS: more dense cataract | No | <1 year    |
| 10 | Other/NH       | Heterotaxy (midline liver, dextrocardia with VSD, horseshoe kidney, small size and developmental delay), imperforate anus                                                                                                                                                               | Intermittent esotropia                                           | OU: White cataract                                                                                | No | < 1 year   |
| 11 | Other/Hispanic | Congenital heart disease (VSD, coarctation of aorta), respiratory distress, IUGR, horseshoe kidney, extremity edema, tethered cord, labial adhesion, hemangioma, developmental delays, hypotonia, hypothyroidism, hypocalcemia, hyperinsulinism, non-occlusive thrombus, delayed growth | Euryblepharon, orbital lipodermoid OS                            | OU: Lamellar cataracts                                                                            | No | 1-10 years |
| 12 | White/NH       | Recurrent respiratory infections, inguinal hernia, delayed early milestones, then normal intelligence                                                                                                                                                                                   | Tilted optic nerves                                              | OU: Ectopia lentis (superior dislocation) cortical haze, proliferation of anterior lens capsule   | No | >10 years  |
| 13 | White/NH       | Hearing loss, developmental delays                                                                                                                                                                                                                                                      | Small esotropia                                                  | OU: Posterior subcapsular cataracts                                                               | No | >10 years  |
| 14 | Other/Hispanic | Small ASD, bilateral SNHL (hearing aids in place, knows sign language), microcephaly, dysmorphic facies,                                                                                                                                                                                | Exotropia, possible bilateral myelinated NFL                     | OD: 1-2+ Cortical with lamellar components, 1+                                                    | No | >10 years  |

|    |                |                                                                                                                                                                                                                                                                                        |                                                                                                                                                                |                                                                                                                                            |    |         |
|----|----------------|----------------------------------------------------------------------------------------------------------------------------------------------------------------------------------------------------------------------------------------------------------------------------------------|----------------------------------------------------------------------------------------------------------------------------------------------------------------|--------------------------------------------------------------------------------------------------------------------------------------------|----|---------|
|    |                | cleft palate, hypotonia, moderate cognitive deficits, pituitary dwarfism                                                                                                                                                                                                               |                                                                                                                                                                | PSC centrally, OS: 2+ Central PSC, 2-3+ cortical with lamellar components                                                                  |    |         |
| 15 | Black/NH       | Epilepsy, developmental delays, left sensorineural hearing loss, failure to thrive, short stature, growth hormone deficiency, asthma, pes planus, eczema, hydrocephalus s/p VP shunt, born at 25 weeks, ADHD, ASD, microcephaly - felt by genetics issues most likely from prematurity | Bilateral optic atrophy/cupping, mild nystagmus, microstrabismus, history of ROP without treatment                                                             | OD: Clear, OS: Small left anterior polar cataract                                                                                          | No | Unknown |
| 16 | White/NH       | Hypotonia, dysmorphic features, lowset, protruding ears, high arched palate, mild motor delays                                                                                                                                                                                         | OD: Microphthalmia, aphakic glaucoma, OS: otherwise normal, variable strabismus                                                                                | OD: Central 5-6 mm dense nuclear and posterior opacification, OS: very minimal cortical haze/posterior opacification with wispy appearance | No | <1 year |
| 17 | Other/NH       | Muscle eye brain disease, static encephalopathy, severe global developmental delay, ventriculomegaly, right side of face slightly smaller, right kidney smaller than left, persistent left superior vena cava draining into coronary sinus                                             | OD: Microphthalmia, PHPV, posterior synechiae, OS: optic nerve hypoplasia, blunted fovea, abnormal blood vessels                                               | OD: White cataract, possible PHPV, OS: possibly traumatic cataract                                                                         | No | Unknown |
| 18 | Other/Hispanic | Hydrocephalus, epilepsy, CP, developmental delay, digital anomalies (missing distal part of fingers and toes 2-5 bilaterally), cortical malformations, possible absence of septum pellucidum, neurogenic bladder                                                                       | Heterochromia (OD mid and peripheral iris atrophy/thin stroma, OS brown), OD: microphthalmia, gliosis off nerve, large chorioretinal scar vs coloboma temporal | OD: Inferior cortical cataract encroaching on visual axis                                                                                  | No | Unknown |

|    |                  |                                                         |                                                                                                                                                |                                                                                                                                                                                                                  |                                                                                    |         |
|----|------------------|---------------------------------------------------------|------------------------------------------------------------------------------------------------------------------------------------------------|------------------------------------------------------------------------------------------------------------------------------------------------------------------------------------------------------------------|------------------------------------------------------------------------------------|---------|
|    |                  |                                                         | to nerve, nerve is dragged, esotropia/exotropia                                                                                                |                                                                                                                                                                                                                  |                                                                                    |         |
| 19 | Black / Hispanic | None                                                    | None                                                                                                                                           | OU: <1 mm bilateral anterior polar cataracts, otherwise clear                                                                                                                                                    | No                                                                                 | Unknown |
| 20 | White / Hispanic | None                                                    | Esotropia, latent nystagmus                                                                                                                    | OU: Diffuse nuclear cataract                                                                                                                                                                                     | No                                                                                 | <1 year |
| 21 | Asian / NH       | Poor growth                                             | Microphthalmia, esotropia                                                                                                                      | OU: Nuclear cataracts (OD more dense than OS)                                                                                                                                                                    | Yes (2 sisters with congenital cataracts, no other known affected relatives)       | <1 year |
| 22 | Other / Hispanic | Borderline small head                                   | Anterior segment dysgenesis (posterior embryotoxon, iris atrophy, PPM, persistent tunica vasculosa lentis, microphthalmia), pendular nystagmus | OD: Anterior polar with nuclear cataract and posterior vacuole (possible Lenticonus)), OS: anterior polar with anterior subcapsular/cortical, scattered nuclear/cortical cataract, prominent anterior lenticonus | No                                                                                 | <1 year |
| 23 | White / NH       | Nance-Horan Syndrome, Penoscrotal webbing, Buried penis | Aphakic glaucoma OD, intermittent exotropia, latent nystagmus                                                                                  | OU: Cortical cataracts                                                                                                                                                                                           | Yes (mother with mild cataracts, maternal grandmother possible cataracts, no other | <1 year |

|    |                  |                                                                                                                                                                                                                          |                                                                                                                                                                                                          |                                                                                                          | known affected relatives) |            |
|----|------------------|--------------------------------------------------------------------------------------------------------------------------------------------------------------------------------------------------------------------------|----------------------------------------------------------------------------------------------------------------------------------------------------------------------------------------------------------|----------------------------------------------------------------------------------------------------------|---------------------------|------------|
| 24 | White / NH       | None                                                                                                                                                                                                                     | OU: Partial aniridia                                                                                                                                                                                     | OU: Small anterior polar cataracts                                                                       | No                        | Unknown    |
| 25 | Asian / NH       | Brachycephaly, hypogonadotrophic hypogonadism, webbing, pharyngeal dysphagia, hypotonia, global developmental delays                                                                                                     | OU: Small optic nerves, likely cortical visual impairment                                                                                                                                                | OU: White cortical cataracts                                                                             | No                        | <1 year    |
| 26 | Unknown/ NH      | None                                                                                                                                                                                                                     | None                                                                                                                                                                                                     | Unknown                                                                                                  | No                        | >10 years  |
| 27 | White/NH         | Failure to thrive, reflux                                                                                                                                                                                                | OU: Aniridia, nystagmus                                                                                                                                                                                  | OD: 3+ Lamellar cataract, OS: Clear                                                                      | No                        | Unknown    |
| 28 | White / NH       | None                                                                                                                                                                                                                     | Anterior segment dysgenesis (partial aniridia, PPM, tunica vasculosa lentis) OS only, foveal hypoplasia OS, congenital optic disc anomaly OS, exotropia OS, chorioretinal coloboma OS, microphthalmia OS | OD: Clear, OS: Megalolenticonus , central posterior cortical/capsular cataract with fine PFV stalk to ON | No                        | <1 year    |
| 29 | Black / NH       | None                                                                                                                                                                                                                     | Nystagmus, bilateral colobomas of iris, nerves, chorioretinas, high myopia                                                                                                                               | OD: Small inferior wedge shaped opacity, OS: Clear                                                       | No                        | Unknown    |
| 30 | White/NH         | None                                                                                                                                                                                                                     | None                                                                                                                                                                                                     | OU: Mixed cataracts with calcium                                                                         | No                        | <1 year    |
| 31 | Other / NH       | None                                                                                                                                                                                                                     | None                                                                                                                                                                                                     | OU: Lamellar/nuclear cataracts                                                                           | No                        | 1-10 years |
| 32 | Other / Hispanic | Microcephaly, developmental delays, cleft palate, dysmorphic features, hypotonia, micrognathia, triphalangeal thumbs, hydrocephalus, posterior fossa cyst, possible seizures, sensorineural hearing loss, dysphagia, hip | haze of cornea superiorly OU, microphthalmia (cornea <10 mm) OU, crowded optic discs but no swelling, OS vertically elongated ON, anomalous vascular pattern from                                        | OU: <1 mm Anterior polar cataracts, otherwise clear                                                      | No                        | Unknown    |

|    |                  |                                                                                                                                                                                                                                                         |                                                                                       |                                                                                                         |    |            |
|----|------------------|---------------------------------------------------------------------------------------------------------------------------------------------------------------------------------------------------------------------------------------------------------|---------------------------------------------------------------------------------------|---------------------------------------------------------------------------------------------------------|----|------------|
|    |                  | dysplasia, PFO/PDA, pigmentary abnormalities of skin                                                                                                                                                                                                    | nerves, otherwise normal fundus, moderate myopia/astigmatism                          |                                                                                                         |    |            |
| 33 | White / NH       | Peripheral neuropathy, lung disease, intellectual disability, failure to thrive, hypotonia, decreased bone density                                                                                                                                      | Exotropia, possible optic nerve pallor                                                | OU: Nuclear cataract                                                                                    | No | 1-10 years |
| 34 | White / NH       | Pachygyria, benign childhood seizure disorder, autism spectrum disorder, poor weight gain, posteriorly thin corpus callosum, eczema                                                                                                                     | Intermittent esotropia                                                                | OU: Diffuse cortical cataracts                                                                          | No | 1-10 years |
| 35 | Other / Hispanic | Ventriculomegaly, Dandy Walker variant, global developmental delay, epilepsy                                                                                                                                                                            | Optic nerve pallor, attenuated retinal vessels, cortical visual impairment, exotropia | OU: Posterior subcapsular cataracts                                                                     | No | Unknown    |
| 36 | White / NH       | VSD, gait abnormalities, epilepsy                                                                                                                                                                                                                       | OU: Aphakic glaucoma, esotropia, nystagmus                                            | OU: Cataracts (type unknown)                                                                            | No | <1 year    |
| 37 | White / NH       | OFCD syndrome - dysmorphic features, dysphagia, club foot, PDA and ASD s/p cardiac surgery, vertical ridging of incisors, laryngeal cleft, delayed dentition, neurogenic bladder, dystrophic toenails, fatty filum/tethered cord, developmental delays  | OU: Progressive high myopia, congenital ptosis upper eyelids, exotropia, DVD          | OU: Posterior cortical cataracts and posterior lenticonus                                               | No | <1 year    |
| 38 | White / NH       | Congenital muscular dystrophy, microcephaly, periventricular white matter changes, mild cognitive deficits                                                                                                                                              | OD: Clinical optic atrophy, OU: Small optic nerves on MRI                             | OD: Millet seed opacities throughout, mostly posterior without sclerosis of nucleus, OS: white cataract | No | >10 years  |
| 39 | Other / Hispanic | Hydrocephalus s/p VP shunt, Vein of Galen malformation, Meckel's diverticulum, mildly dilated aortic root and main pulmonary artery, tiny muscular VSD, pectus excavatum, joint hypermobility, port wine stains, hyperinsulinemia, hypertriglyceridemia | OU: High myopia, questionable history of exudative retinopathy                        | OD: Tiny round posterior cortical opacity, OS: Small central cortical spoke opacity                     | No | >10 years  |



|    |                  |                                                                                                                                                                                                                                                                                                                     |                                                                                                                               |                                                                                                                    |                                                                |            |
|----|------------------|---------------------------------------------------------------------------------------------------------------------------------------------------------------------------------------------------------------------------------------------------------------------------------------------------------------------|-------------------------------------------------------------------------------------------------------------------------------|--------------------------------------------------------------------------------------------------------------------|----------------------------------------------------------------|------------|
| 40 | Asian / NH       | Sensorimotor neuropathy, short stature, secondary amenorrhoea, spinocerebellar ataxia                                                                                                                                                                                                                               | OU: High myopia                                                                                                               | OD: 3mm posterior polar cataract, no stalk, OS: 3 mm posterior polar cataract, no stalk, few small cortical spokes | No                                                             | >10 years  |
| 41 | White / Hispanic | Pigmentary mosaicism, toe deformity, laryngomalacia with mild subglottic narrowing, many pigmented nevi, failure to thrive, speech delay                                                                                                                                                                            | None                                                                                                                          | OD: Anterior polar cataract, OS: Clear                                                                             | Yes (mother with cataracts, no other known affected relatives) | >10 years  |
| 42 | White / Hispanic | ASD with PDA, torticollis, hypotonia with hypertronia, developmental delay                                                                                                                                                                                                                                          | OD: Mild microphthalmia, myopic fundus, grayish nerve, staphyloma, myopic/blonde fundus, severe myopia, esotropia; OS: Normal | OD: Posterior subcapsular cataract, not in visual axis, OS: Clear                                                  | No                                                             | Unknown    |
| 43 | Other/Hispanic   | DiGeorge Syndrome, recurrent OM, multiple dental anomalies, AV canal, subaortic stenosis s/p surgery, hx BPD, asthma, hx dysphagia, EOE, polydactyly of left hand, abnormal digits on both feet with marked varus deformity of toes, mild learning difficulties, hypogammaglobulinemia, history of poor weight gain | OU iris nevi, IXT                                                                                                             | OD: Cortical lamellar superotemporal cataract not visually significant, OS: Clear                                  | No                                                             | >10 years  |
| 44 | Other/Hispanic   | Feeding intolerance, hypertonia, some developmental delays                                                                                                                                                                                                                                                          | Nystagmus, esotropia                                                                                                          | OU: Mixed lamellar/nuclear cataracts obstructing posterior view of fundus                                          | No                                                             | <1 year    |
| 45 | Other/Hispanic   | Microcephaly, epilepsy, global developmental delays, persistent feeding issues, hypotonia                                                                                                                                                                                                                           | OU: Possible temporal pallor of optic nerves                                                                                  | OU: Diffuse opacification of                                                                                       | No                                                             | 1-10 years |

|    |                |                                                                                                                                                                                                                                                                  |                                                                                                                                                                                                                                |                                                                                                                      |    |            |
|----|----------------|------------------------------------------------------------------------------------------------------------------------------------------------------------------------------------------------------------------------------------------------------------------|--------------------------------------------------------------------------------------------------------------------------------------------------------------------------------------------------------------------------------|----------------------------------------------------------------------------------------------------------------------|----|------------|
|    |                |                                                                                                                                                                                                                                                                  |                                                                                                                                                                                                                                | anterior capsule and cortex                                                                                          |    |            |
| 46 | Other/Hispanic | Walker-Warburg syndrome: epileptic encephalopathy, muscle weakness, hydrocephalus, chronic respiratory failure                                                                                                                                                   | OU: microphthalmia, persistent tunica vasculosa lentis with no view posteriorly B scan with thick stalks from lens to nerve - likely bilateral retinal detachment/PFV, corneal anomaly, likely Peters OD (cornea/lens touch OD | OU: Posterior cataract, dense/retrolental membrane, suggestive of PFV                                                | No | Unknown    |
| 47 | Black/NH       | Complicated birth history (lack of prenatal care, intrauterine drug exposure, IVH s/p surgery, neonatal seizures, neonatal cerebral cystic leukomalacia, jaundice), spastic hemiplegic cerebral palsy, sensorineural hearing loss, cholestasis and transaminitis | OU: Hypopigmented foveal scar, esotropia                                                                                                                                                                                       | OU: Diffuse nuclear cataracts                                                                                        | No | <1 year    |
| 48 | Black/NH       | Epilepsy, neurodevelopmental delay, fifth finger flexion deformity, congenital ankle valgus, mild dysmorphic features                                                                                                                                            | Esotropia                                                                                                                                                                                                                      | OD: Non-visually significant cortical cataract peripherally, OS: Intumescent cataract                                | No | 1-10 years |
| 49 | Other/Hispanic | Lennox Gastaut Syndrome, intractable epilepsy, dysphagia and global developmental delay, nocturnal hypoxemia, pectus excavatum                                                                                                                                   | Nystagmus, cortical visual impairment                                                                                                                                                                                          | OU: Lamellar cataract with cortical component (likely visually significant but same behavior so no surgery done yet) | No | Unknown    |
| 50 | White/NH       | Failure to thrive, delayed postnatal growth, neonatal hypoglycemia, developmental delay, hypotonia, hypothyroid, upper airway resistance syndrome, NASH, Legg-Calvé-Perthes disease                                                                              | Esotropia                                                                                                                                                                                                                      | OU: Dense white cataracts                                                                                            | No | 1-10 years |

|    |          |                                                                                      |                                    |                                                                                                            |                                                                      |           |
|----|----------|--------------------------------------------------------------------------------------|------------------------------------|------------------------------------------------------------------------------------------------------------|----------------------------------------------------------------------|-----------|
| 51 | White/NH | Developmental delay, stroke, scoliosis, osteopenia, microcephaly                     | Bilateral lagophthalmos, exotropia | OD: White cataract, OS: Mild PFV, not visually significant                                                 | No                                                                   | >10 years |
| 52 | White/NH | Paraganglioma of carotid body, congenital chordee, hereditary paraganglioma syndrome | None                               | OD: 0.1 mm Focal opacity over posterior capsule, nasal to visual axis, not visually significant, OS: Clear | Yes (father with early cataracts, no other known affected relatives) | >10 years |

“NH” = Not Hispanic. OD = right eye, OS = left eye, OU = both eyes. “Yes” for Family History includes patients with family history of congenital cataracts. Age at surgery is divided into 4 groups: (1) patients with severe cataracts in infancy requiring surgery <1 year old, (2) patients with cataracts that progress to becoming visually significant after infancy but still during the amblyogenic period (1-10 years old), (3) patients with cataracts that either remain visually insignificant or require surgery after the amblyogenic period (>10 years old), and (4) patients that are <10 years old currently and have not needed surgery yet (“Unknown”).

“WAGR” = Wilms tumor, aniridia, genitourinary anomalies, and intellectual disability, “VSD” = ventricular septal defect, “PFO” = patent foramen ovale, “ADHD” = attention-deficit/hyperactivity disorder, “ASD” = autism spectrum disorder, “CNS” = central nervous system, “IUGR” = intrauterine growth restriction, “SNHL” = sensorineural hearing loss, “VP” = ventriculoperitoneal, “CP” = cerebral palsy, “PDA” = patent ductus arteriosus, “OFCD” = oculofaciocardiodental syndrome, “IVH” = intraventricular hemorrhage, “NASH” = nonalcoholic steatohepatitis  
“ROP” = retinopathy of prematurity, “PHPV” = persistent hyperplastic primary vitreous, “PPM” = persistent pupillary membrane, “DVD” = dissociated vertical deviation

Supplementary Table S3. Pathogenic (P), Likely Pathogenic (LP), and Variants of Uncertain Significance (VUS) Identified in Initial Genetic Testing of Patients with Congenital Cataracts

| Patient # | Gene            | Transcript  | C.           | P.               | Zygoty       | Highest Allele Frequency        | Classification | Reclassification |
|-----------|-----------------|-------------|--------------|------------------|--------------|---------------------------------|----------------|------------------|
| 19        | <i>CAPN15</i>   | NM_005632.2 | c.2432C>T    | p.Ala811Val      | Heterozygous | 0.017%, Eastern Asian           | VUS            | VUS              |
|           | <i>CYP27A1</i>  | NM_000784.3 | c.1343G>A    | p.Arg448His      | Heterozygous | 0.038%, African                 | VUS            | VUS              |
|           | <i>FYCO1</i>    | NM_024513.3 | c.3323A>G    | p.Lys1108Arg     | Heterozygous | 0.47%, African                  | VUS            | VUS              |
| 20        | <i>CRYBB2</i>   | NM_000496.2 | c.158T>C     | p.Leu53Pro       | Heterozygous | Novel variant                   | VUS            | VUS              |
| 21        | <i>INPP5B</i>   | NM_005540.2 | c.730C>T     | p.Arg244*        | Heterozygous | Novel variant                   | VUS            | VUS              |
|           | <i>LTBP2</i>    | NM_000428.2 | c.1258G>A    | p.Ala420Thr      | Heterozygous | 0.0097%, South Asian            | VUS            | VUS              |
|           | <i>POMT2</i>    | NM_013382.5 | c.1754C>G    | p.Thr585Arg      | Heterozygous | Novel variant                   | VUS            | VUS              |
| 22        | <i>PAX6</i>     | NM_000280.4 | c.151G>A     | p.Gly51Arg       | Heterozygous | Unknown (not novel)             | LP             | P                |
| 23        | <i>NHS</i>      | NM_198270.3 | c.322G>T     | p.Glu108*        | Hemizygous   | Unknown (not novel)             | P              | P                |
| 25        | <i>RAB3GAP1</i> | NM_012233.2 | c.452_453del | p.Ser151Cysfs*38 | Homozygous   | Novel variant                   | LP             | LP               |
|           | <i>RAB3GAP1</i> | NM_012233.2 | c.1198T>C    | p.Ser400Pro      | Homozygous   | 0.006%, Latino                  | VUS            | VUS              |
|           | <i>BFSP1</i>    | NM_001195.4 | c.1574A>G    | p.Gln525Arg      | Heterozygous | 0.0027%, European (Non-Finnish) | VUS            | VUS              |

|    |                 |                |           |                 |              |                                 |     |     |
|----|-----------------|----------------|-----------|-----------------|--------------|---------------------------------|-----|-----|
|    | <i>BFSP1</i>    | NM_001195.4    | c.1480G>A | p.Gly494Arg     | Heterozygous | 0.34%, South Asian              | VUS | VUS |
|    | <i>ADAMTS10</i> | NM_030957.3    | c.557G>A  | p.Arg186His     | Heterozygous | 0.13%, South Asian              | VUS | VUS |
|    | <i>AGPS</i>     | NM_003659.3    | c.220A>T  | p.Thr74Ser      | Heterozygous | 0.04%, South Asian              | VUS | LB  |
|    | <i>ERCC1</i>    | NM_202001.2    | c.818T>C  | p.Leu273Ser     | Heterozygous | Novel variant                   | VUS | VUS |
| 26 | <i>COL18A1</i>  | NM_030582.3    | c.2300C>T | p.Ala767Val     | Heterozygous | 0.16%, European (Non-Finnish)   | VUS | VUS |
|    | <i>GALK1</i>    | NM_000154.1    | c.814A>G  | p.Lys272Glu     | Heterozygous | 0.0030%, European (Non-Finnish) | VUS | VUS |
| 27 | <i>PAX6</i>     | NM_001368890.2 | c.358del  | p.Val120Cysfs*4 | Heterozygous | Unknown                         | P   | LP  |
| 30 | <i>CRYAA</i>    | NM_000394.3    | c.347G>A  | p.Arg116His     | Heterozygous | Unknown (not novel)             | P   | P   |
|    | <i>CRYBB1</i>   | NM_001887.3    | c.300C>T  | Silent          | Heterozygous | 0.03%                           | VUS | VUS |
| 31 | <i>ERCC2</i>    | NM_000400.3    | c.1906C>T | p.Arg636Trp     | Heterozygous | 0.0098%, South Asian            | VUS | VUS |
|    | <i>ERCC2</i>    | NM_000400.3    | c.58G>A   | p.Glu20Lys      | Heterozygous | Novel variant                   | VUS | VUS |
| 32 | <i>PHACTR4</i>  | NM_001048183.1 | c.1868T>C | p.Leu623Pro     | Mosaic       | Novel variant                   | VUS | VUS |
| 33 | <i>ALDH18A1</i> | NM_002860.3    | c.482G>A  | p.Cys161Tyr     | Heterozygous | Novel variant                   | LP  | LP  |

|    |                |                |                |                   |              |                       |      |     |
|----|----------------|----------------|----------------|-------------------|--------------|-----------------------|------|-----|
| 34 | <i>DYNC1H1</i> | NM_001376.4    | c.4868G>A      | p.Arg1623Gln      | Heterozygous | Novel variant         | LP   | P   |
|    | LRP5           | NM_002335.2    | c.2384A>G      | p.Asn795Ser       | Heterozygous | 0.002-0.01%, European | VUS  | VUS |
| 35 | <i>KIF1A</i>   | NM_001244008.2 | unavailable    | unavailable       | Heterozygous | Unknown               | P    | n/a |
| 36 | <i>BCOR</i>    | NM_017745.5    | c.1857dupC     | p.Ser620GlnmfsX25 | Heterozygous | Novel variant         | LP/P | LP  |
|    | <i>ATP2A3</i>  | NM_174953.2    | c.2021G>A      | p.Arg674His       | Heterozygous | 0.49%, European       | VUS  | LB  |
| 37 | <i>BCOR</i>    | NM_017745.5    | c.3487C>T      | p.Arg1163Stop     | Heterozygous | Novel variant         | LP/P | P   |
| 40 | <i>SYNE1</i>   | NM_033071.3    | c.19010T>A     | p.Leu6337Ter      | Homozygous   | Novel variant         | P    | LP  |
|    | AAAS           | NM_015665.5    | c.43C>A        | p.Gln15Lys        | Heterozygous | Unknown (not novel)   | P    | P   |
| 41 | <i>PIK3R1</i>  | NM_181523.2    | c.18C>G        | p.Tyr6Ter         | Heterozygous | Novel variant         | VUS  | LP  |
| 42 | <i>RARB</i>    | NM_000965.4    | c.844G>A       | p.Gly282Ser       | Heterozygous | Novel variant         | LP   | LP  |
| 43 | <i>WDPCP</i>   | NM_015910.5    | c.1594_1596del | p.Leu532del       | Heterozygous | 0.0016%               | VUS  | VUS |
|    | <i>WDPCP</i>   | NM_015910.5    | c.2125G>A      | p.Gly709Arg       | Heterozygous | 0.0004%               | VUS  | VUS |
| 46 | <i>POMT1</i>   | NM_007171.3    | c.1241+1G>A    | NA                | Homozygous   | 0.0033%, South Asian  | P    | P   |
| 47 | <i>NOTCH2</i>  | NM_024408.4    | c.4999G>T      | p.Val1667Phe      | Unknown      | Unknown (not novel)   | VUS  | LB  |
| 48 | <i>CSNK2B</i>  | NM_001320.6    | c.500T>C       | p.Leu167Pro       | Heterozygous | Novel variant         | LP   | LP  |
|    | <i>KCNB1</i>   | NM_004975.2    | c.1169G>T      | p.Gly390Val       | Heterozygous | Novel variant         | LP   | LP  |
| 49 | <i>NR4A2</i>   | NM_006186.4    | c.325dup       | p.Gln109Profs*3   | Heterozygous | 0.0004%               | P    | P   |

|    |                |              |             |                 |              |                                                         |      |     |
|----|----------------|--------------|-------------|-----------------|--------------|---------------------------------------------------------|------|-----|
|    | <i>DYNC1H1</i> | NM_001376.4  | c.11806G>A  | p.Val3936Met    | Heterozygous | 0.01%,<br>Latino                                        | VUS  | LB  |
|    | <i>PNKP</i>    | NM_007254.3  | c.416G>A    | p.Arg139His     | Heterozygous | 0.3%,<br>European                                       | VUS  | LB  |
|    | <i>SCN2A</i>   | NM_021007.2  | c.2149+3A>C | unknown         | Heterozygous | Novel<br>variant                                        | VUS  | VUS |
| 50 | <i>GRB10</i>   | NM_005311.4  | c.1456G>A   | p.Val486Met     | Heterozygous | Unknown                                                 | LP/P | VUS |
| 51 | <i>NGLY1</i>   | NM_018297.3  | c.1201A>T   | p.Arg401Ter     | Homozygous   | Unknown                                                 | LP/P | P   |
| 52 | <i>SDHD</i>    | NM_0003002.4 | c.53dupC    | p.Leu19SerfsX50 | Heterozygous | Unknown<br>(in father,<br>not<br>otherwise<br>reported) | LP/P | P   |
